# Supplementary material for: Kisspeptin-Activated Autophagy Independently Suppresses Non-Glucose-Stimulated Insulin Secretion from Pancreatic β-Cells
Source: PubMed Central journal article supplement (PMC6877614; doi:10.1038/s41598-019-53826-7), 2019-11-25
Supplement: 41598_2019_53826_MOESM1_ESM.pdf [file 41598_2019_53826_MOESM1_ESM.pdf]

# **Kisspeptin-Activated Autophagy Independently Suppresses Non-Glucose-Stimulated Insulin Secretion from Pancreatic $\beta$ -Cells**

Chien Huang<sup>1, #</sup>, Hao-Yi Wang<sup>1, #</sup>, Mu-En Wang<sup>1, 2</sup>, Meng-Chieh Hsu<sup>1</sup>, Yi-Hsieng Samuel Wu<sup>1</sup>, Yi-Fan Jiang<sup>3</sup>, Leang-Shin Wu<sup>1</sup>, De-Shien Jong<sup>1</sup>, and Chih-Hsien Chiu<sup>1, \*</sup>

<sup>1</sup>Laboratory of Animal Physiology, Department of Animal Science and Technology, National Taiwan University, Taipei 10617, Taiwan

<sup>2</sup>Department of Pathology, Duke University School of Medicine, Duke Cancer Institute, Duke University, Durham, NC 27514, USA.

<sup>3</sup>Graduate Institute of Molecular and Comparative Pathobiology, School of Medicine, National Taiwan University, Taipei 10617, Taiwan

#Equal contribution

**\*Corresponding Author: Chih-Hsien Chiu**

Laboratory of Animal Physiology, Department of Animal Science and Technology  
National Taiwan University

No. 50, Lane 155, Section 3, Keelung Road, Taipei City 106, Taiwan

Tel.: +886-2-3366-4171; Fax: +886-2-3366-4070; Email: [chiuchihhsien@ntu.edu.tw](mailto:chiuchihhsien@ntu.edu.tw)

## Supplementary Tables

**Table 1. Antibodies used in Western Blotting**

| Antibody Name             | Company                   | Product Number | Dilution |
|---------------------------|---------------------------|----------------|----------|
| Anti-GFP                  | Santa Cruz Biotechnology  | sc-9996        | 1:1000   |
| Anti-Kiss1                | Cloud-Clone Corp          | PAC559Mu01     | 1:400    |
| Anti- $\beta$ -actin      | Santa Cruz Biotechnology  | sc-47778       | 1:2500   |
| Anti-SQSTM1/p62           | abcam                     | ab109012       | 1:1000   |
| Anti-LC3                  | Cell Signaling Technology | #2775          | 1:1000   |
| Anti-insulin              | Cell Signaling Technology | #8138          | 1:1000   |
| Anti-ATG5                 | Cell Signaling Technology | #12994         | 1:1000   |
| Anti-GAPDH                | Cell Signaling Technology | #2118          | 1:2500   |
| Anti-PARP                 | Cell Signaling Technology | #9532          | 1:1000   |
| Anti-Cleaved<br>Caspase 3 | Cell Signaling Technology | #9661          | 1:250    |

**Table 2. Primers used in qPCR analyses**

| Gene Name      | Forward (5' to 3')    | Reverse (5' to 3')     |
|----------------|-----------------------|------------------------|
| <i>Insulin</i> | GCAGAGAGGAGGTACTTTGGA | GGTAGGAAGTGCACCAACAG   |
| <i>RPL19</i>   | GCTCTTTCCTTTCGCTGCTGC | CAGTCACAGGCTTGCGGATGAT |

## Supplementary Figure Legends

**Supplementary Figure S1.** The full-length blot of GFP, Kiss1,  $\beta$ -actin presented in Figure 2 of the main text.

**Supplementary Figure S2.** The full-length blot of GFP, p62, LC3, Proinsulin,  $\beta$ -actin presented in Figure 3 of the main text.

**Supplementary Figure S3.** The full-length blot of p62, LC3, Proinsulin,  $\beta$ -actin presented in Figure 4 of the main text.

**Supplementary Figure S4.** The full-length blot of ATG5, p62, LC3, Proinsulin,  $\beta$ -actin presented in Figure 5 of the main text.

**Supplementary Figure S5.** The full-length blot of ATG5, p62, LC3, Proinsulin,  $\beta$ -actin presented in Figure 7 of the main text.

**Supplementary Figure S6.** The dosage response of the glucose-stimulated insulin secretion in NIT-1 cells by measuring luminescent activity of luciferase. After 30-minute collection, the insulin secretion from NIT-1 under 0, 5.5, 11 and 16.5 mM glucose challenge was measured by luciferase activities. Quantifications normalized by total protein in NIT-1 cells are shown as the means  $\pm$  standard errors of the mean (n = 3). Different letters represent significant difference determined by one-way ANOVA with post-hoc tests.

**Supplementary Figure S7.** The bafilomycin treatment does not trigger apoptosis in NIT-1 cells. Representative blots of apoptosis markers in NIT-1 cells after treating with 0, 1, 5, or 20 nM bafilomycin for 6 h; quantifications normalized by  $\beta$ -actin are shown as the means  $\pm$  standard errors of the mean (n = 3). Indicated markers have no significant differences determined by one-way ANOVA.

**Supplementary Figure S8.** Short-term exposure of kisspeptin decreases (pro)insulin level and activated autophagy in NIT-1 cells. After transfecting pcDNA3.1+mKiss1-T2A-GFP plasmid for 66 h, the growth media for NIT-1 cells were changed to blank media for another 6-hour culture. After 6-hour culture, the conditioned media from control and *Kiss1*-overexpressing group were collected and then treated to the non-treated NIT-1 cells for 2 minute. Then, the conditioned media-treated cell lysates from two group were collected for further analysis. The treated conditioned media to control group were collected from NIT-1 cells transfected with reagent only. Representative blots of autophagy markers and (pro)insulin in short-term treated NIT-1 cells and quantifications normalized by GAPDH are shown as the means  $\pm$  standard errors of the mean (SEM). \*compared with the control; \*p < 0.05, \*\*p < 0.01.

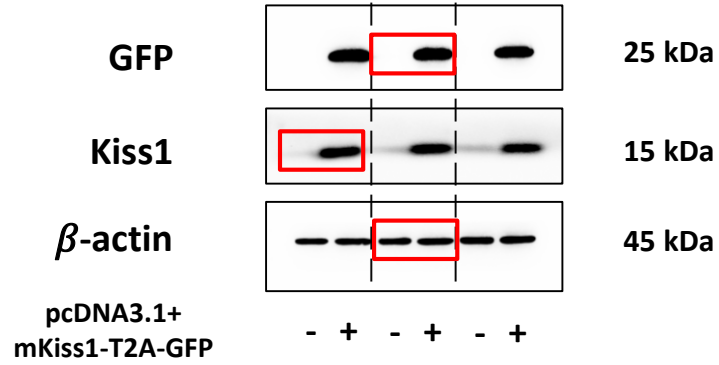

**Supplementary Figure S1**

**a**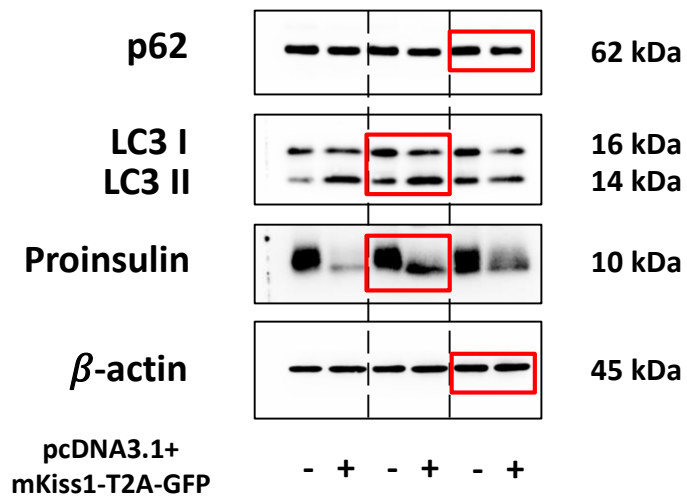**b**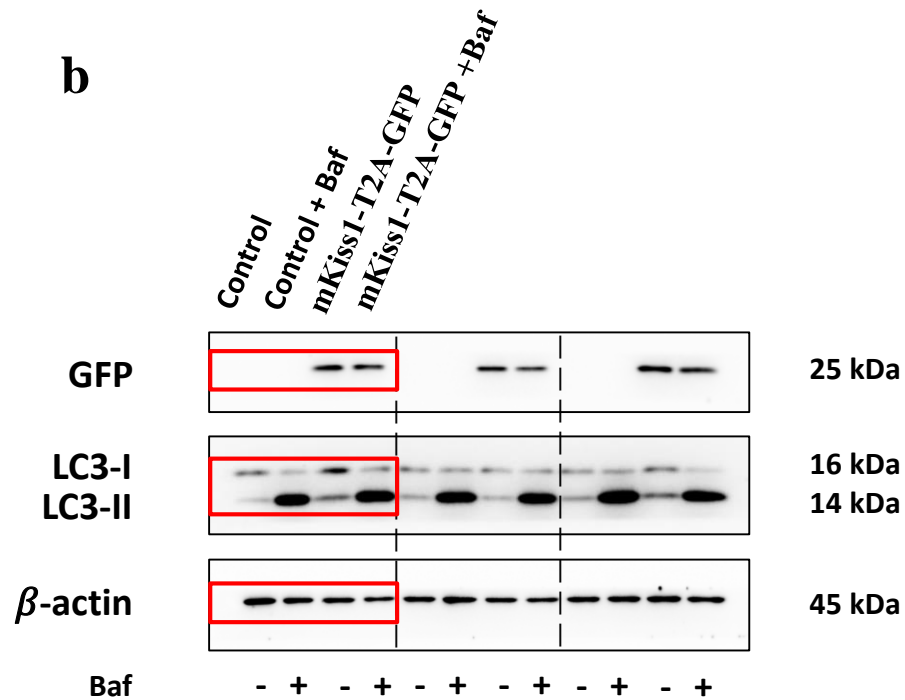**Supplementary Figure S2**

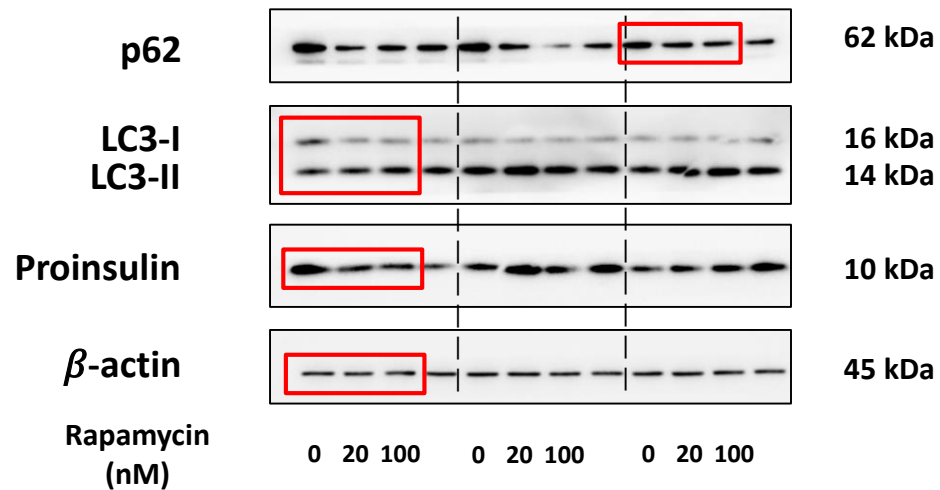

**Supplementary Figure S3**

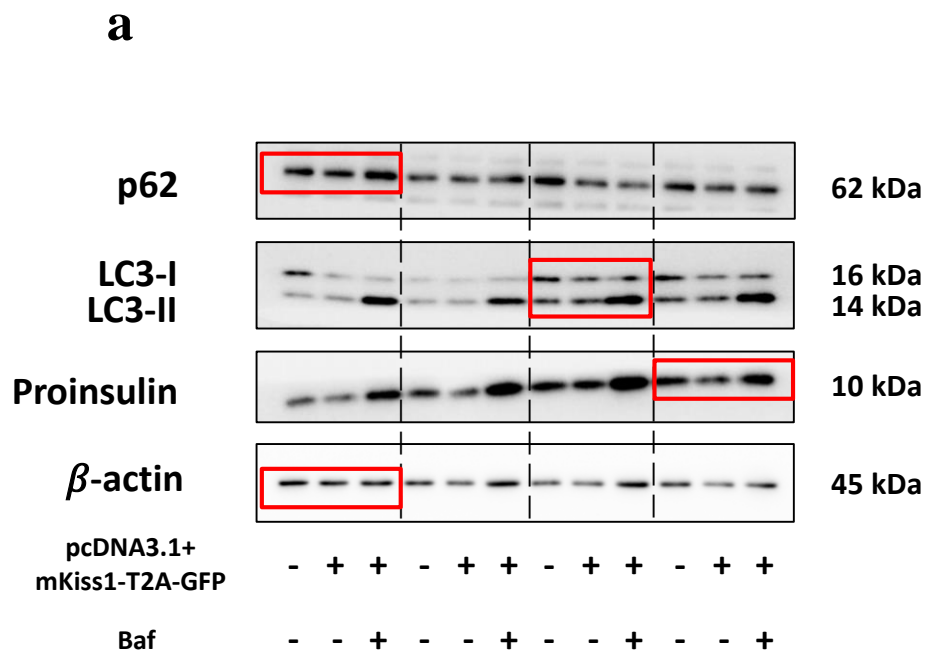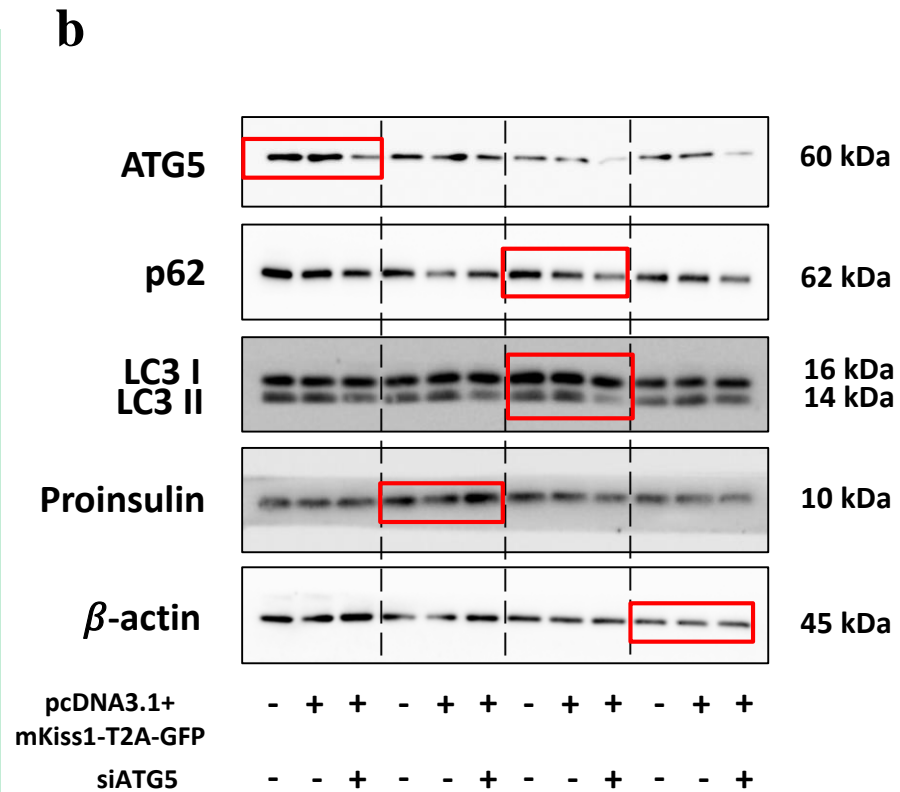

**Supplementary Figure S4**



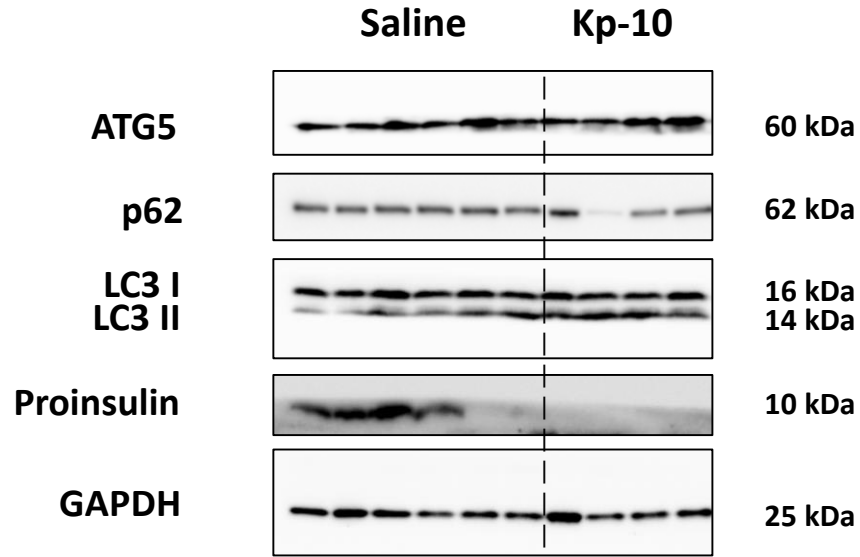

**Supplementary Figure S5**

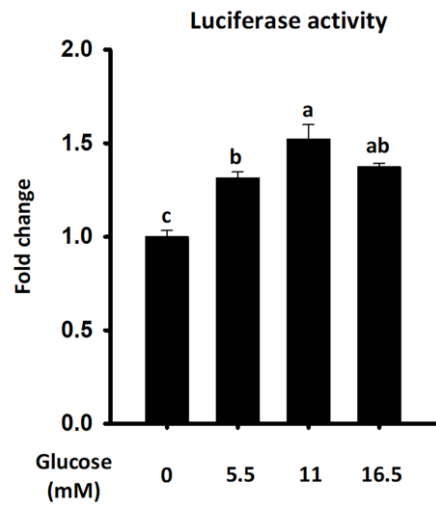

**Supplementary Figure S6**

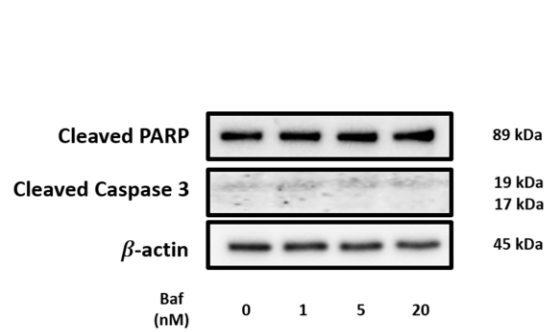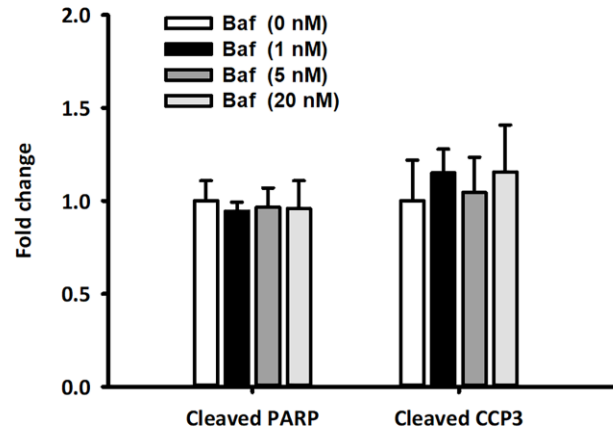

**Supplementary Figure S7**

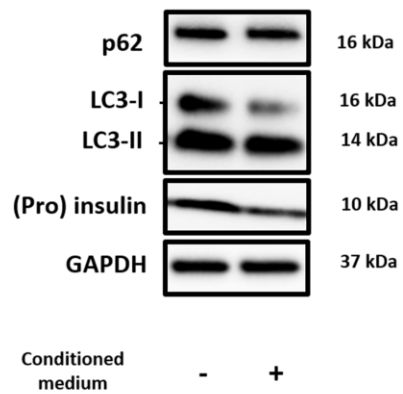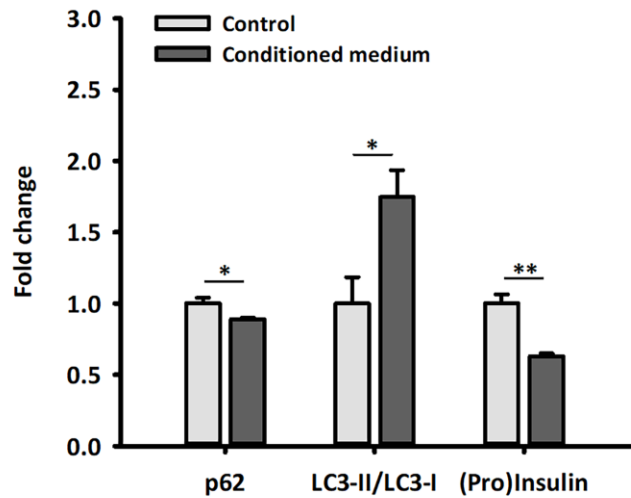

**Supplementary Figure S8**
